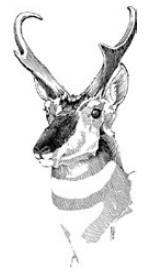

## *Pteronura brasiliensis* (Carnivora: Mustelidae)

PAULA NOONAN, SIOBHAN PROUT, AND VIRGINIA HAYSEN

[www.mammalogy.org](http://www.mammalogy.org)

Department of Biological Sciences, Smith College, Northampton, MA 01063, USA; [seastarediting@aol.com](mailto:seastarediting@aol.com) (PN); [prout.siohban@gmail.com](mailto:prout.siohban@gmail.com) (SP); [vhayssen@smith.edu](mailto:vhayssen@smith.edu) (VH)

**Abstract:** *Pteronura brasiliensis* (Zimmermann, 1780), the giant otter, is the largest freshwater otter. Found in South America, it inhabits slow-moving rivers and creeks and feeds predominantly on fish. Extinct in the southern portions of its former range, *P. brasiliensis* is listed as “Endangered” by the International Union for Conservation of Nature and Natural Resources. Threats to *P. brasiliensis* include habitat destruction, illegal hunting, and disease.

**Key words:** giant otter, mustelid, South America

Synonymies completed 14 June 2017

DOI: 10.1093/mspecies/sex012

Version of Record, first published online September 8, 2017, with fixed content and layout in compliance with Art. 8.1.3.2 ICZN. Nomenclatural statement.—A life science identifier (LSID) number was obtained for this publication: urn:lsid:zoobank.org:pub:202F2BF5-6E54-40CA-8A87-13AFA3D375FB

### *Pteronura* Gray, 1837

*Lutra* Zimmermann, 1777:485. Type species *Lutra brasiliensis* Ray, 1693.

*Saricoviene* Zimmermann, 1777:485. Type species *Lutra brasiliensis* Ray, 1693.

*Mustela* Gmelin, 1788:93. Type species *Mustela lutris brasiliensis* (Ray, 1693).

*Saricoviene* Schinz, 1821:213. Type species *Lutra brasiliensis* Ray, 1693.

*Pteronura* Gray, 1837:580. Type species *Pteronura sambachii*.

*Pterura* Wiegmann, 1839a:285. Type species *Pteronura [sambachii]* Gray, 1837.

*Pteronurus* Lesson, 1842:72. Unjustified emendation of *Pteronura* Gray, 1837.

*Saricovia* Lesson, 1842:72. Type species *Lutra brasiliensis* Ray, 1693.

*Lontra* Gray, 1843:70. Type species *Lutra brasiliensis* Ray, 1693.

*Pteroneura* Sanderson, 1949:774. Unjustified emendation of *Pteronura* Gray, 1837.

CONTEXT AND CONTENT. Order Carnivora, family Mustelidae, subfamily Lutrinae. *Pteronura* is monotypic.

### *Pteronura brasiliensis* (Zimmermann, 1780)

#### Giant Otter

*Lutra brasiliensis* Ray, 1693:189. No type locality given; stated as “in fluviis americae meridionalis” by Gmelin (1788:93); and subsequently restricted to “río São Francisco, en la orilla

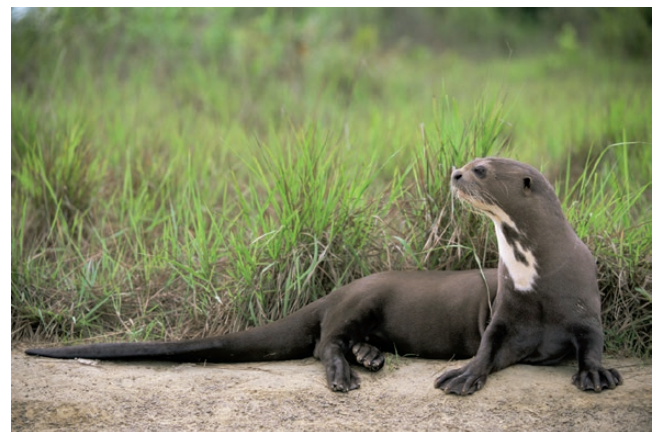

**Fig. 1.**—Adult *Pteronura brasiliensis* from Karanambu-Rupununi, Guyana (© Pete Oxford/naturepl.com).

correspondiente al estado de Alagoas” Brazil by Cabrera (1958:274).

*Lutra nigricans* Barrère, 1749:155. No type locality; refers to a composite specimen.

*Lutra atricoloris* Brisson, 1762:278. Type locality “Brésil.”

*Lutra (brasiliensis)* Zimmermann, 1780:316. First legitimate use after 1758. Parentheses in original.

[*Mustela lutris*] *brasiliensis*: Gmelin, 1788:93. Name combination.

*Lutra brasiliana* Shaw 1800:446. Unjustified emendation of *brasiliensis* Ray, 1693.

*Lutra nitens* Olfers, 1818:233. Type locality “Brasilien.”

*Lutra lupina* Schinz, 1821:213. No type locality.

- Lutra paraguaensis* Schinz, 1821:213. No type locality.
- Lutra paranensis* Rengger, 1830:128. Type locality “Paraguay.”
- Pteronura sambachii* Gray, 1837:580. Type locality “Demerara.”
- Pteronura sanbachii* Gray, 1839:Plate XIV. Unjustified emendation of *sambachii* Gray, 1837.
- Pteronurus sandbackii* Lesson, 1842:72. Unjustified emendation of *sambachii* Gray 1837.
- Lutra sandbackii*: Lesson, 1842:72. Name combination.
- Saricovia brasiliensis*: Lesson, 1842:72. Name combination.
- Mustela brasiliensis*: Lesson, 1842:72. Name combination.
- Lontra brasiliensis*: Gray, 1843:70. Name combination.
- Pterura sandbachii*: Gray, 1869:114. Name combination attributed to Wiegmann, 1839b:392.
- Pteronura sandbachii kappleri* Gray, 1869:114. Type locality “Surinam.”
- Pteronura brasiliensis*: Thomas, 1908:390. First use of current name combination.
- [*Pteronura*] *sambachii* Pohle 1919 (1920):115. Unjustified emendation of *sambachii* Gray, 1837.
- P[teronura]. b[rasiliensis]. lupina*: Pohle 1919 (1920):117. Name combination.
- P[teronura]. b[rasiliensis]. paranensis*: Pohle 1919 (1920):117. Name combination.
- Pteroneura braziliensis* Sanderson, 1949:774. Unjustified emendation of *brasiliensis* Ray, 1693.

CONTEXT AND CONTENT. Context as for genus. Historically a northern and southern subspecies have been named but genetic data do not support this distinction (Garcia et al. 2007). Thus, the species is monotypic.

NOMENCLATURE NOTES. *Lutra brasiliensis* Ray, 1693 and *Lutra nigricans* Barrère, 1749 predate the formal start of binomial nomenclature. In addition, Barrère’s description refers to a composite of *P. brasiliensis* and *Eira barbara* identified as *Carigueya brasilienebus* by Marcgraf 1648:222. *Saricoviene* was used by Zimmermann (1777:485) in reference to the giant otter but *Saricovienne* was used by Shaw (1800:447) for a cat-sized otter and thus not *Pteronura*. Gray (1869:114) attributes *Pterura sandbachii* to “Wiegmann’s Arch. iv. p392, 1838 (published 1839)” but Wiegmann refers only to the genus and does not give a species name. Confusion regarding nomenclature arose from early descriptions confounding the sea otter (*Enhydra lutris*) and *Pteronura brasiliensis* (extensive details in Harris 1968; Husson 1978).

Common names include hwana-dagu (Sanderson 1949), lontra (Gray 1843), margin-tailed otter (Thomas 1908), and Surinam otter (Gray 1868). Other common names are Guiana flat-tailed otter, winged-tailed otter, grote waterhond, grote visotter, platstaart otter, and watradogoe (Husson 1978), as well as ariranha, lobito de cola ancha, lobo del río, lobo corbata, londra, lobo del río grande, lontra gigante, onça-d’água, and perro de água (Carter and Rosas 1997; Rodrigues et al. 2013). Local names in Argentina include lobo gargantilla, arirai, and nutria

gigante (Chehèbar 1991); in Guyana, water dog, turara, saaru, eniabu peru, and turáclá (van der Waal 2012).

## DIAGNOSIS

*Pteronura brasiliensis* is longer (maximum total length: up to 1,800 [intact]–2,440 mm [skin] versus 1,200 mm) and heavier (23–32 kg versus 5–15 kg) than the Neotropical otter, *Lontra longicaudis* (formerly, *Lutra enudris*—Harris 1968; Larivière 1999; Rosas et al. 2009a). The webbing on the feet of *P. brasiliensis* extends to the claws, but that of the Neotropical otter does not (Husson 1978). The tail of *P. brasiliensis* is flattened, while that of the Neotropical otter is cylindrical (Husson 1978). The Neotropical otter lacks the white patches on the throat (Duplaix 1980).

## GENERAL CHARACTERS

*Pteronura brasiliensis* (Fig. 1) has fawn, reddish, dark grayish, or chestnut brown fur with white or cream patches on the throat (Harris 1968; Husson 1978). Individuals can be identified by their throat patterns (Duplaix 1980; Schenck and Staib 1998). Rarely, individuals (3 out of 294) have no throat marking (Groenendijk et al. 2014).

For 11 captive males from the Amazon River basin, the maximum total length was 1,630 mm, and the maximum mass 22.5 kg; 4 females had a maximum length of 1,620 mm and mass of 28.8 kg (Rosas et al. 2009a). The mass–length relationship did not reveal significant sex differences and is expressed by  $W \text{ (kg)} = 1.48 \times 10^{-5} L \text{ (cm)}^{2.81}$  (Rosas et al. 2009a). Compiled from over 15 sources from 1817 to 1978 and using diverse techniques including measurements of skins, historical ranges for total length for males were 1,500–1,800 mm and for females 1,500–1,700 mm; the weight range for females (22–26 kg) was lower than that for males (26–32 kg—Duplaix 1980). External measurements (mm) for an adult male from Suriname were: head-body length, 1,050; tail length, 573; length of hind foot with claw, 175 (Sanderson 1949). Measurements (mm) for an adult male and female from the Araguaia River in Brazil were: head circumference, 325, 330; neck circumference, 325, 365; head length, 220, 190; head-body length: 1,070, 970; tail length, 650, 555; ear length, 22, 22; ear width, 20, 20; length of hind foot, 210, 190; height, 330, 280 (Silveira et al. 2011). Mean total length (mm) and mass (kg) of 6 captive males in Brazil, but of unknown origin, were: 1,556.67 and 21.25, respectively (de Oliveira et al. 2011). Mean measurements (mm; parenthetical *n*) for males and females, respectively, from unspecified locations were: head-body length, 948.33 (2), 1,045, (2); tail length, 492.67 (3), 555 (2); total length, 1,441 (3), 1,615 (3—Rengger 1830; Nehring 1899[1900]; Allen 1910; Vieira 1952). Mean lengths (mm; parenthetical *n*) of animals of unknown sex and location were: head-body length, 1,007.83 (6); tail length,

552.83 (6); total length, 1,480.1 (10—Schomburgk 1840; Gervais 1855; Gray 1869; Burmeister 1879; Waterton 1879; Quelch 1901; Fountain 1902; Santos 1945; Burton 1962). Masses (kg) for 3 animals of unknown sex were: 31.8, 34.2, 24.0 (Fountain 1902; Sanderson 1949). Measurements (mm) for a subadult female were: head-body length, 770; tail length, 500; and total length, 1,270 (Nehring 1899[1900]). The skeleton of a 4-month-old *P. brasiliensis* had a head-body length of 324 mm, tail length of 191 mm, and a total length of 515 mm (Rengger 1830). A 3- to 4-month-old male cub from Brazil weighed 4 kg; total length was 1,140 mm, tail length 330 mm, and hind foot length 130 mm (Lima and Marmontel 2011). Four (2 males and 2 females) 3-day-old cubs weighed 198, 177, 192, and 172 g, respectively; total lengths were 327, 325, 318, and 324 mm; tail lengths 121, 120, 118, and 123 mm; hind foot lengths 39, 37.5, 37.6, and 39 mm; and ear lengths 4.6, 4.5, 4.8, and 4.6 mm (Hantke and Kitchener 2015).

Skull (Fig. 2) measurements (mm) for 1 female and 4 males, respectively, from Suriname were: condylobasal length: 153.6, 143.1, 145.8, 155.8, 154.9; palatal length: 76.3, 71.5, 75.0, 77.8, 76.0; zygomatic breadth: 92.0, 85.0, 94.3, 94.9, 97.2; interorbital constriction: 17.1, 17.5, 15.8, 16.7, 17.4; postorbital constriction: 17.6, 18.1, 16.1, 16.7, 17.3; length of postorbital constriction:

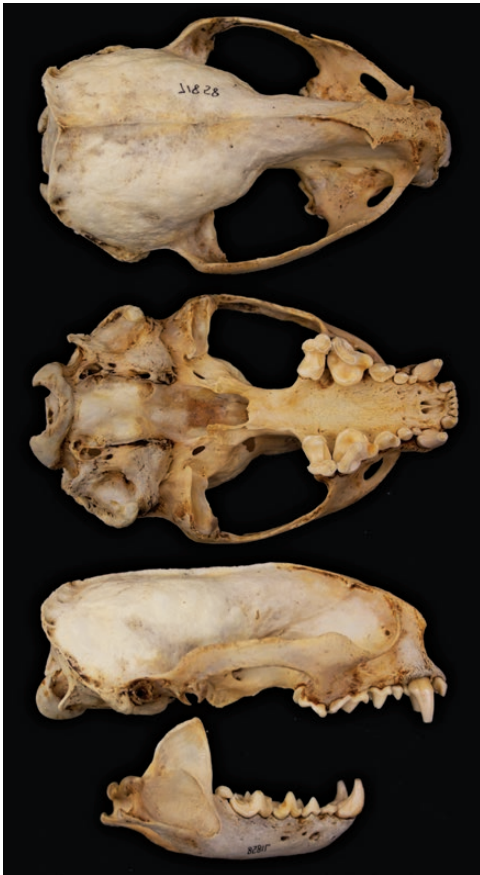

**Fig. 2.**—Dorsal, ventral, and lateral views of skull and lateral view of mandible of an adult male specimen AMNH (American Museum of Natural History) 71858. Greatest length of skull is 147.25 mm.

35, 27, 32, 41, 35; mastoid breadth: 82.4, 76.0, 79.4, 87.4, 81.1; length of upper toothrow C–M1: 48.0, 45.8, 47.6, 50.0, 49.6; length of upper carnassial: 18.3, 16.8, 17.3, 17.8, 17.4; greatest diameter of upper molar: 16.7, 15.5, 15.5, 15.4, 16.1; width across canines: 35.0, 31.8, 31.8, 31.8, 34.0; length of mandible: 99.5, 95.9, 100.1, 104.1, 103.9; length of lower carnassial: 19.6, 19.0, 18.0, 18.7, 19.5 (Husson 1978). Skull measurements (mm) for 3 females were: condylobasal length: 148.0, 154.0, 164.0; basal length: 135.0, 142.0, —; width across postorbital processes: 31.0, 24.6, —; interorbital breadth: 19.3, 18.4, —; intertemporal length: 37.0, 34.0, —; mastoid breadth: 97.7, 85.2, —; zygomatic width: 97.4, 97.9; 98.0; length of mandible: —, —, 105.0; total length: —, —, 165.0 (Pohle 1919 (1920); Vieira 1952). Skull measurements (mm) for 2 males were: condylobasal length: —, 149.0; basilar length: 142.0, —; zygomatic width: 99.0, 98.0; width of mastoid process: 88.0, —; length of mandible: —, 105.0; height of forehead (including lower jaw): 74.0, —; total length: 157.0, 150.0 (Nehring 1899[1900]; Vieira 1952). Skull measurements (mm) for 2 adults of unknown sex were: condylobasal length: 147.1, 147.5; basal length: 136.5, 135.? [sic]; interorbital breadth: 18.6, 16.2; width across postorbital processes: 23.8, 19.2; intertemporal length: 32.0, 27.0; mastoid breadth: 75.3, 77.3; zygomatic width: 93.7, 92.1 (Pohle 1919 (1920)).

Limb measurements (mm) from 1 specimen (AMNH [American Museum of Natural History] 30190) were: scapula—maximum length of head, 22.7, maximum width of head, 14.2, length of neck, 20.2, width of neck, 9.6; humerus—length, 113.6, proximal width, 26.3, distal width, 33.3; radius—length, 74.9, proximal width, 14.6, proximal depth, 11.3, distal width, 20.5, distal depth, 14.8; scapholunar—length, 9.6, width, 9.4, depth, 12.5; cuneiform—length, 5.4, width, 9.4, depth, 12.2; metacarpal—length, II, 35.6, III, 40.7; femur—length, 102.0, proximal width, 33.3, midshaft width, 13.9, midshaft depth, 10.7, distal width, 30.1, distal depth, 25.6; tibia—length, 116.2, proximal width, 29.9, distal width, 23.2, distal depth, 15.2; astragalus—length, 26.7, width, 17.5; calcaneum—length, 40.9, width, 21.3; navicular—width, 20.0, depth, 10.7; cuboid—length, 14.6, width, 11.6; ectocuneiform—length 10.2, width, 10.0, depth, 16.2; metatarsal—length I, 32.4, II, 47.2, III, 56.9, IV, 60.1 (Bjork 1970).

The medullary cone apex was close to the L4 vertebra on 2 specimens and between the L3 and L4 vertebrae on a 3rd specimen (Machado et al. 2009). The medullary cone length was 55 mm for all 3 (Machado et al. 2009).

## DISTRIBUTION

*Pteronura brasiliensis* (Fig. 3) lives on major river systems in South America from the Guianas to Uruguay (Harris 1968) up to elevations of about 1,000 m (Groenendijk et al. 2015). In Bolivia, the minimum population estimate is 350 individuals, mostly within national parks (van Damme et al. 2002). It has disappeared from the southern portion of Brazil, except for isolated



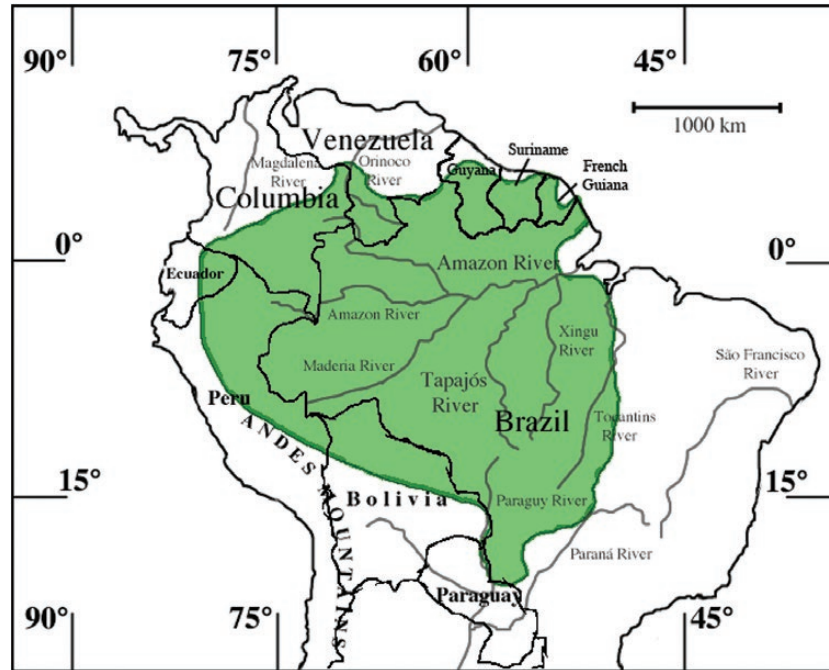

**Fig. 3.**—Geographic distribution of *Pteronura brasiliensis*. Modified from the International Union for Conservation of Nature and Natural Resources *Red List of Threatened Species* (2015).

populations in the Amazon basin (Chehébar 1990); 80 otters were sited near the Jauaperi River (Evangelista and Rosas 2011b). Colombia, Guyana, and Suriname have the strongest populations (Chehébar 1990; Barnett et al. 2000); in the Orinoquia region of Colombia, a group of 8 individuals was observed (Díaz and Sánchez 2002). In Ecuador, *P. brasiliensis* was found in isolated areas (Chehébar 1990). In French Guiana, it may live in the interior (Chehébar 1990). In Bolivia, small populations of *P. brasiliensis* are present in national parks (Carter and Rosas 1997). In Ecuador and Peru, *P. brasiliensis* lives east of the Andes, with populations in isolated Amazon tributaries (Carter and Rosas 1997); 8 otters were sited near the Tapiche River (Tramm 2014). In Paraguay, populations lived on the Paraguay and Prana rivers, with remnant populations elsewhere (Carter and Rosas 1997). *P. brasiliensis* is probably extinct in Uruguay (Carter and Rosas 1997) and Argentina (Parera 1992). In Venezuela, small populations exist in protected areas (Chehébar 1990). A decades old skull was recovered from Corrientes Province, Argentina (Beccaceci and Waller 2000).

### FOSSIL RECORD

The extinct Pliocene *Satherium piscinaria* may be an ancestor to *Pteronura brasiliensis*, based on comparisons of skull, dental, and skeletal measures (Bjork 1970). A fossil specimen of *P. brasiliensis*, the first to be found in Argentina, was also determined to be the oldest of existing records, at 125,000–130,000 years ago (Prevosti and Ferrero 2008). The body was larger than current specimens and showed minor differences in the skull and dentition (Prevosti and Ferrero 2008). Analysis of 21 *P.*

*brasiliensis* skins from the upper Amazon and the Orinoco basin determined that 2 clades diverged about 37,000 years ago, and divergence within those clades was between 10,000 and 20,000 years ago (de Thoisy et al. 2013).

### FORM AND FUNCTION

**Form.**—The iris is pale green-yellow ochre (Sanderson 1949). The nose is hairy (Gray 1868). *Pteronura brasiliensis* has long mystacial, supraciliary, and gular vibrissae (Duplaix 1980). Outside each ankle is a large tuft of hair (Gray 1868). Anal glands are 40 mm with 5-mm diameter, black openings, on either side of the anus (Sanderson 1949). The secretions of the anal gland are a cream color, can be forcibly ejected, and have a fishy smell (Sanderson 1949). The tail is furred, thick, and rounded with a ridge on each side (Gray 1868). The plantigrade feet have 5 webbed digits with claws (Duplaix 1980).

The pars intermedia of the hair shafts exhibit an irregular mosaic pattern (Kuhn and Meyer 2010). The primary hairs (mm, mean  $\pm$  SD) are short and parallel,  $11 \pm 0.6$ ; the secondary hairs are  $5 \pm 0.2$  (Kuhn and Meyer 2010). The width of the primary hairs is  $0.097 \pm 0.0099$  (Kuhn and Meyer 2010).

**Function.**—Hemoglobin values (mean  $\pm$  SD) of 6 captive individuals (3 male, 3 female) were  $16.36 \pm 2.81$  g/dl; mean packed cell volume was  $50.66 \pm 7.77\%$  (Rosas et al. 2008a). Red blood cell counts were  $6.82 \pm 1.64 \times 10^6/\text{mm}^3$  for females,  $5.860 \pm 0.59 \times 10^6/\text{mm}^3$  for males. White blood cell counts were  $6.325 \pm 1.52 \times 10^3/\text{mm}^3$  for females,  $4.77 \pm 1.66 \times 10^3/\text{mm}^3$  for males (Rosas et al. 2008a). Other hematology values (not separated by

sex) were: mean corpuscular value, 74.63 fl; mean corpuscular hemoglobin, 24.58 pg; mean corpuscular hemoglobin concentration 33.05 g/dl; red cell distribution width, 14.54%; platelets, 401.81  $10^3/\text{mm}^3$ ; platelet distribution width, 14.28%; basophils, 0.30%; eosinophils, 0.87%; segmented neutrophils, 80.03%; lymphocytes, 16.24%; monocytes, 1.10%. Mean biochemistry values were: glucose, 100.67 mg/dl; uric acid, 1.33 mg/dl; urea, 221.50 mg/dl; creatinine, 1.80 mg/dl; cholesterol, 314.33 mg/dl; triglycerides, 19.50 mg/dl; aspartate aminotransferase, 183.67 U/l; alanine aminotransferase, 114.33 U/l; total bilirubin, 0.20 mg/dl; alkaline phosphates, 53.33 U/l; lactic dehydrogenase, 1226.33 mg/dl; gamma GT, 17.67 U/l; amylase, 9.33 U/l; calcium 9.57 mg/dl; phosphorus, 5.80 mg/dl; magnesium, 3.73 mg/dl; total protein, 7.00 g/dl; albumin, 3.60 g/dl; globulin, 3.70 g/dl (Rosas et al. 2008a).

Dentition is i 3/3, c 1/1, p 4/3, m 1/2, total 36, with the lower premolar sometimes absent (Husson 1978; Duplaix 1980). Infrared thermography shows heat dissipation from the entire body and tail due to its relatively short and thin hair, although the coldest parts of the body are the feet and tail (Kuhn and Meyer 2009, 2010).

## ONTOGENY AND REPRODUCTION

Gestation is 52–70 days (Hayssen et al. 1993; Carter and Rosas 1997). In a captive population of *Pteronura brasiliensis*, the mean interval between births was 180–214 days ( $n = 3$ —Londoño and Muñoz 2006). Litter size is 1–5 young with an average of 2 (Hayssen et al. 1993; Carter and Rosas 1997; Groenendijk et al. 2014). Pseudopregnancies may last as long as a normal pregnancy (Londoño and Muñoz 2006).

Neonatal mass is 0.20 kg (Carter and Rosas 1997). The sex of cubs as young as 3 days old can be determined by comparing the distance between the genital and anal openings, with the distance for male cubs about 8 times longer than that of females (Hantke and Kitchener 2015). By 2 weeks, cubs can float and swim but with the tail in the air and superficial immersion (Evangelista and Rosas 2011a). Eyes open at 1 month (Carter and Rosas 1997). By 6–8 weeks, pups are able to swim independently (Londono and Munoz 2006; Evangelista and Rosas 2011a). Initial attempts at hunting begin around 2.5 months (Evangelista and Rosas 2011a). Weaning and autonomy occurs at 4–9 months (Hayssen et al. 1993; Carter and Rosas 1997; Evangelista and Rosas 2011a). Subadults usually swim in the middle of a group (Duplaix 1980). Growth layers in canines can be used to age *P. brasiliensis* (de Oliveira et al. 2007).

An analysis of 6 *P. brasiliensis* males that died in captivity in Brazil showed a ratio of testes mass to body mass of  $0.046 \pm 0.0071\%$  ( $SD$ —de Oliveira et al. 2011). Mean diameter ( $\mu\text{m} \pm SD$ ) of the seminiferous tubules was  $126.3 \pm 13.37$ ; for epididymal tubules,  $198.8 \pm 31.39$  (de Oliveira et al. 2011). The length and width ( $\text{cm} \pm SD$ ) of the testes were  $2.76 \pm 0.15$  and  $1.46 \pm 0.09$ , respectively (de Oliveira et al. 2011). The presence

of spermatozoa indicated that 2-year-old *P. brasiliensis* are sexually mature (de Oliveira et al. 2011).

## ECOLOGY

**Population characteristics.**—Between 4,400 and 7,600 *Pteronura brasiliensis* are estimated to be in wild populations (Groenendijk et al. 2015). One male lived approximately 15 years in the wild (Davenport 2010). A long-term study in Peru recorded the oldest male at 15.5 years and oldest female at 13.5 years, although the average life expectancy was 4.5–5.5 years (Groenendijk et al. 2014). In captivity, maximum life span of *P. brasiliensis* is 17–20 years (Weigl 2005; de Oliveira et al. 2007). Two deaths in Brazil were described as the natural death of a young adult female due to emaciation, and the other the result of serious wounding to an adult (Rosas and de Mattos 2003).

**Space use.**—*Pteronura brasiliensis* prefers slow-moving water with an abundance of food and sloping banks with protective cover (Duplaix 1980). Groups may remain in the same territory for 5 or more years (Schenck and Staib 1998), but may abandon territories during the flooding season (Leuchtenberger et al. 2013). The mean size of *P. brasiliensis* territories in the Panatanal of Brazil was 3.6–7.9  $\text{km}^2$  in the wet season and 0.1–2.3  $\text{km}^2$  in the dry season (Leuchtenberger et al. 2013). During the dry season in Xixuaú Reserve, Brazil, 4 territories ranged from 4.6 to 10.5  $\text{km}^2$ ; for 1 group, the range contracted when cubs were present (Evangelista and Rosas 2011b). The average distance between the centers of 2 group territories was 10.8  $\text{km}$  (Leuchtenberger and Mourão 2008).

Campsites are areas along a riverbank that have been cleared of vegetation (Duplaix 1980). In Suriname, campsites were about 800 by 700  $\text{cm}$  (Duplaix 1980). In Brazil, average campsite length ( $n = 193$ ) was 312  $\text{cm}$  and 270  $\text{cm}$  wide (Lima et al. 2012). Average resting sites ( $n = 62$ ), cleared but not associated with a latrine, were 408  $\text{cm}$  long and 235  $\text{cm}$  wide (Lima et al. 2012). In Brazil, mean den entrance width ( $n = 182$ ) was 56  $\text{cm}$ , with an average height of 41  $\text{cm}$  (Lima et al. 2012). The average height of 49, oval, round or elongate den openings was 28.77  $\text{cm}$  with a width of 56.11  $\text{cm}$  (Rosas et al. 2007). Dens averaged 175  $\text{cm}$  above water level with a slope of  $29^\circ$  (Lima et al. 2012). A den may have 1–3 chambers, as well as a backdoor tunnel (Duplaix 1980).

Spraints are found in communal latrines, where *P. brasiliensis* mixes the feces with mud (Duplaix 1980). The latrines are in the core of territories, but individual spraints may mark the edges of the territory (Duplaix 1980).

**Diet.**—*Pteronura brasiliensis* is primarily piscivorous especially when dry conditions concentrate fish in small areas, but it will opportunistically add crustaceans, mollusks, and terrestrial vertebrates to its diet (Duplaix 1980; Estes 1989; Rosas et al. 1999; Staib 2005; Cabral et al. 2010; Silva et al. 2014). Studies of communal latrines on the Brazilian Amazon revealed Perciformes to be the most frequent prey, followed

by Characiformes (Rosas et al. 1999; Cabral et al. 2010; Silva et al. 2014). *P. brasiliensis* feces at the Balbina hydroelectric reservoir in Brazil frequently contained remnants of piranhas (Cabral et al. 2010). Drought conditions may have resulted in *P. brasiliensis* feeding on caimans in the Pantanal wetland (Ribas et al. 2012).

*Pteronura brasiliensis* immediately consumes what it catches; the prey is eaten headfirst (Duplaix 1980). Dives can last from 5 to 72 s (Duplaix 1980). Underwater, it turns over rocks, scrapes submerged wood, and digs in the substrate on the bottom (Costa-Pereira 2012).

Average daily food consumption was 2.29 kg for an adult female and 1.52 kg for a young male in Brazil (Carter et al. 1999). The mean digestive transit time for 3 otters was 3.13 h ( $SD = 0.52$  h), as determined by particulate markers (Carter et al. 1999).

**Diseases and parasites.**—*Pteronura brasiliensis* is highly susceptible to parvovirus and distemper, which may be transmitted by village dogs (Schenck and Staib 1998). Otters looking for mates are potential vectors for transmission of these diseases (Schenck and Staib 1998). One of 3 *P. brasiliensis* in a captive population tested positive for *Salmonella aberdeen* (Gopee et al. 2000).

Although 21 out of 26 carnivore species in Brazil had ticks (*Amblyomma*, *Boophilus microplus*, *Dermacentor nitens*, *Ixodes aragaoi*, and *Rhipicephalus sanguineus*), *P. brasiliensis* was 1 of the 5 species that did not (Labruna et al. 2005). One tick nymph (*Amblyomma cajennense*) was attached to the lower lip of a *P. brasiliensis* (Rosas et al. 2016). Endoparasites include *Alaria clathrate*, *A. pseudoclathrata*, *Anchlostoma*, *Baschkirovitrema incrassatum*, *Cryptocotyle thapari*, *Cryptosporidium*, *Diphyllobothrium*, *Diplostomum alarioides*, *Dirofilaria*, *D. spectans*, *Galeiceps longispiculum*, *Molineus major*, *Paragonimus rudis*, *Strongyloides*, *Subulura amazonica*, *S. interrogans* (Freitas and Lent 1941, 1949; Rosas et al. 2016).

**Interspecific interactions.**—In Guyana, predators of *Pteronura brasiliensis* are reported as jaguars (*Panthera onca*), anacondas (*Eunectes*), and caimans (Shackley 1998) but without direct evidence. Felids (e.g., puma—*Puma concolor*), birds of prey (e.g., harpy eagle—*Harpia harpyja*), and large snakes (e.g., bushmaster—*Lachesis muta*) are potential predators. One cub was preyed on or scavenged by a lizard in Brazil (Rosas et al. 2008b). Also in Brazil, a solitary, sleeping adult female *P. brasiliensis* was killed by a jaguar (Ramalheira et al. 2015). In contrast, *P. brasiliensis* groups can mob jaguars and force them to leave the area (Leuchtenberger et al. 2016).

In Suriname, *P. brasiliensis* and the Neotropical otter are sympatric seasonally and perhaps year-round on several river systems (Duplaix 1980). However, their diets differ in composition and size of prey (Duplaix 1980; Silva et al. 2014). *P. brasiliensis* consumes larger fish, but the Neotropical otter eats a wider variety of prey, including a rodent (Silva et al. 2014). Also in Brazil, a study showed that the Neotropical otter has a large ecological space that encompasses a smaller *P. brasiliensis* space, with the Neotropical otter associated with deep, wide waterways and *P. brasiliensis* with creeks (Muanis and Oliveira 2011).

A close association has been observed between *P. brasiliensis* and *Inia geoffrensis*, the freshwater dolphin, in Colombia (Defler 1983). *P. brasiliensis* fishes close to riverbanks while dolphins fish 1–5 m away, and the 2 species occasionally swim upriver together, a short distance apart (Defler 1983). In Brazil, small fishes have been observed emerging to feed after *P. brasiliensis* disturbs the underwater sediment (Costa-Pereira 2012).

**Miscellaneous.**—Radiotagging 2 *Pteronura brasiliensis* with 42-g transmitters implanted in the peritoneal cavity provided location data for up to 12 months (Silveira et al. 2011; Leuchtenberger et al. 2013). Biopsy darts were used to obtain tissue samples for genetic analysis of 45 *P. brasiliensis* (Ribas 2012).

## HUSBANDRY

Two forms of anesthesia have been given intramuscularly (mean  $\pm$   $SD$ ) in a captive population. The 1st form ( $n = 4$ ) consisted of 5% ketamine hydrochloride ( $8.78 \pm 0.91$  mg/kg) + 2% xylazine ( $1.92 \pm 0.15$  mg/kg). The induction time was  $7.75 \pm 0.96$  min (Rosas et al. 2008a). The 2nd form ( $n = 7$ ) consisted of tiletamine hydrochloride/zolazepam hydrochloride ( $1.93 \pm 0.57$  mg/kg) followed by 1% atropine sulfate ( $0.09 \pm 0.02$  mg/kg). The induction time was  $4.33 \pm 0.58$  min (Rosas et al. 2008a). Mean rectal temperature under anesthesia ( $n = 8$ ) was  $39.16 \pm 0.59^\circ\text{C}$  (Rosas et al. 2008a). A mixture of the 2 anesthesia protocols is also used (Leuchtenberger et al. 2013). Three males captured in Brazil were anesthetized for implantation of radiotransmitters using a combination of tiletamine and zolazepam (2.0 mg/kg) and a dosage of 1.5 mg/kg ketamine hydrochloride (10%) combined with 0.25 mg/kg midazolam (Leuchtenberger et al. 2013). The otters were also given 0.5 ml of penicillin (intramuscularly) and 2 mg/kg of an anti-inflammatory/analgesic (subcutaneously—Leuchtenberger et al. 2013).

Minor wounds and lacerations of young adult rehabilitated *P. brasiliensis* (15–22 kg) were treated with 250 mg of amoxicillin (15–20 mg/kg 2 to 3 times a day), 120 mg enrofloxacin (5–7.5 mg/kg once a day), and 325 mg aspirin (15 mg/kg once or twice a day) with the medications added to the fish diet (McTurk and Spelman 2005).

Young adult rehabilitated *P. brasiliensis* were monthly given the following on a rotating basis: pyrantel pamoate (10 mg/kg) for nematodes, ivermectin (0.2 mg/kg) for parasites (including ectoparasites), and praziquantel (5 mg/kg) for cestodes (McTurk and Spelman 2005). Extensive husbandry information for captive-bred populations can be found in Sykes-Gatz (2004) and Smith et al. (2009). Captive breeding occurs internationally at several facilities in South America, Europe, North America, and Asia (Sykes-Gatz 2004; Wildlife Reserves Singapore 2013).

## BEHAVIOR

**Grouping behavior.**—*Pteronura brasiliensis* is diurnal, social, and territorial (Duplaix 1980; Carter and Rosas 1997;



Ribas and Mourão 2004). In Suriname, groups were made up of an alpha pair and different generations of their offspring, up to 20 individuals total (Duplaix 1980). In Balbina hydroelectric lake in Brazil, 130 *P. brasiliensis* were observed in 29 groups, with a mean group size of 4.14 (the largest was 12—Rosas et al. 2007); in the Xixuaú Preserve, 80 otters were recorded as part of 15 groups that averaged 4.46 individuals (Evangelista and Rosas 2011b). In Argentina, *P. brasiliensis* individuals have been seen but not in groups (Chehébar 1990). Although social groups are generally assumed to be composed of a dominant male and female and their prior offspring, genetic analysis of 13 *P. brasiliensis* groups indicated variable relatedness among groups although on average the relatedness within groups was high ( $r = 0.23$ —Ribas et al. 2016). Groups of *P. brasiliensis* mark and defend their territories with scent marks and vocalizations (Duplaix 1980; Ribas and Mourão 2004; Leuchtenberger and Mourão 2009).

A group of related *P. brasiliensis* may travel and hunt together and usually remain within calling distance of each other (Duplaix 1980). One or more females determine the group's activities (Duplaix 1980). Two otters may touch nose to nose, even after a few minutes of separation (Duplaix 1980). When the mate of a breeding female disappears, her new mate adopts the cubs of the previous male (Evangelista 2004; Groenendijk et al. 2014).

In Brazil, a group was observed attacking an individual that had entered their territory; the 4 individuals swam at a high speed with their heads held above the surface for 15 s at a time (Ribas and Mourão 2004). This unusual swimming pattern was accompanied by vocalizations, and individuals took turns attacking the intruder (Ribas and Mourão 2004). Such attacks to the face, genitals, and forelimbs may result in death (Rosas and de Mattos 2003).

Transients are unmated individuals outside of a group (Duplaix 1980; Laidler 1986). In Guyana, transients were observed following a family group that contained cubs, perhaps in search of a mate (Laidler 1986). After the family left a site, the transients would mark it (Laidler 1986). Groups of 2–5 non-breeding transients, either single-sex or mixed-sex individuals, have been observed (Groenendijk et al. 2014).

**Reproductive behavior.**—A pair of *Pteronura brasiliensis* in captivity began copulating 3–10 days after pups were born (Londoño and Muñoz 2006). The male initiated copulation, which lasted 5–110 min (Londoño and Muñoz 2006). The male mounted the female while the pair was in shallow water (Londoño and Muñoz 2006).

In Brazil, births occurred August through December ( $n = 11$ ) during periods of receding water or low water, though births may take place during the wet or dry seasons in other locations (Evangelista and Rosas 2011a). In Peru, births occurred year-round, but predominantly in the dry season (88.7%—Groenendijk et al. 2014). A 2nd litter may be born later in the season if the 1st litter does not survive (Duplaix 1980). One female in Peru produced 2 litters in a year (1 cub, followed by 5 cubs—Groenendijk et al. 2014). Lifetime reproductive success ranges from 0 to 25

cubs, with females averaging 6.9 and males 6.7 (Groenendijk et al. 2014). Litters are commonly raised in excavated dens but caves may also be used (Camilo-Alves and Desbiez 2005).

Pairs of male and female *P. brasiliensis* are monogamous but have help with parental care (Duplaix 1980; Davenport 2010). The 1 breeding female is dominant (Duplaix 1980). When the dominant female dies, a sister or daughter often takes her place; however, in 2 cases a sister and a daughter were observed displacing the dominant female (Groenendijk et al. 2014). The majority of care for young is alloparental and includes care by males (Duplaix 1980; Rosas et al. 2009b). Family members help raise the young by assisting with defense, grooming, and feeding (Davenport 2008, 2010; Evangelista and Rosas 2011b). In Brazil, cubs were left alone about one-half the time; otherwise, an adult babysitter (77% of occurrences) or parent and babysitter (23% of occurrences) remained with the cubs (Rosas et al. 2009b).

Only 65% of cubs survive; about 50% survive to the age of dispersal (Groenendijk et al. 2014). Young disperse at 1.5–4 years old (Duplaix 1980; Leuchtenberger and Mourão 2008; Davenport 2010). The higher presence of females in 1 group (19) compared to males (10) suggests that female offspring tend to be more philopatric (Leuchtenberger and Mourão 2008). No male philopatry was observed in a study of 294 individuals (Groenendijk et al. 2014).

For female *P. brasiliensis*, the earliest age of reproduction is 3.0 years, with average age of 4.4 years (Groenendijk et al. 2014). Females reproduce for an average of 3.2 years (Groenendijk et al. 2014). Males also reproduce as early as 3.0 years, with an average of 4.6 years (Groenendijk et al. 2014). They reproduce for an average of 3.1 years (Groenendijk et al. 2014).

**Communication.**—Vocalizations include a loud bark reminiscent to that of a sea lion (Sanderson 1949). In Suriname, 9 vocalizations were described and sonograms recorded: a HAH! sound, a snort in reaction to alarm or danger, a warning scream, a growl, a hum, a coo, a whistle, newborn cub squeaks, and cub whines and wails (Duplaix 1980). Spectrograms of 5 vocalizations—snort, scream, purr, HAH! sound, and cub call—were recorded in Brazil (Bezerra et al. 2011). The loud, wavering scream signals distress and may cause other *P. brasiliensis* to offer assistance (Duplaix 1980; Davenport 2010). Recordings of wild *P. brasiliensis* in Peru and in captivity showed that individuals have distinct calls when trying to contact other otters (Mumm et al. 2014).

In Brazil, 4 types of scent marking were identified: stepping, with paws rubbed on the ground; forepaw rubbing, with paws rubbed on a vertical surface; body rubbing, with the body rubbed on the ground or other surface; and latrine use (feces and urine—Leuchtenberger and Mourão 2009). The alpha male marks his territory more often (62% of marking events) than the alpha female (17%—Leuchtenberger and Mourão 2008). Alpha males and females often mark over the scent marks of other group members (32 of 59 events and 5 of 16 events, respectively—Leuchtenberger and Mourão 2009). In Guyana, 1 marking site was over 4.6 m long (Laidler and Laidler 1995).

**Miscellaneous behavior.**—*Pteronura brasiliensis* is diurnal, emerging at dawn and returning to its den at dusk (Duplaix 1980). However, nocturnal activity has been observed during the wet season in Brazil: 1 instance was due to the presence of a jaguar, others to nocturnal fishing and latrine use (Leuchtenberger et al. 2014). *P. brasiliensis* dries itself by rubbing on the ground and grooming as soon as it leaves the water (Duplaix 1980).

A begging *P. brasiliensis* will remain near a family member with food and make consistent, loud vocalizations (Davenport 2010). The *P. brasiliensis* with food will growl defensively and avoid the beggar while it eats most of its prey (Davenport 2010). It will give the remainder of the food to the beggar without resistance (Davenport 2010). For juveniles that are no longer nursing, the main source of food is received by begging from their parents and siblings (Davenport 2010).

Family members were observed assisting an elderly, non-reproductive matriarch (Davenport 2010). If she lost the group during a hunt, the other *P. brasiliensis* would swim to her and bring her back to the other family members (Davenport 2010). She was no longer able to catch large prey, and she begged from her family members with a 26% success rate (Davenport 2010).

*Pteronura brasiliensis* does not normally engage in infanticide, but an adult male was observed preying on and eating a male cub that had been left unsupervised in its burrow (Mourão and Carvalho 2001).

## GENETICS

*Pteronura brasiliensis* ( $n = 4$ ) has diploid number ( $2n$ ) of 38 chromosomes, including 2 sex chromosomes (fundamental number [FN] of 64—Franco-de-Sá 2007). Autosomal chromosomes include 14 metacentric, 8 submetacentric, 6 subtelocentric, and 8 acrocentric. Both sex chromosomes are submetacentric (Franco-de-Sá 2007).

Fecal sampling in Bolivia ( $n = 20$ ) revealed 19 loci that could be amplified consistently; heterozygosity between 0.15 and 0.85 was observed (Pickles et al. 2009). Microsatellite loci for 14 *P. brasiliensis* from Brazil revealed 14 dinucleotide and trinucleotide polymorphic loci with 2–5 alleles each; heterozygosity was 0.577 (Ribas et al. 2011).

Cytochrome-*b* and cytochrome-*c* oxidase analysis did not support a subspecies division, although the populations may be geographically structured (Garcia et al. 2007). High genetic diversity exists across 4 lineages of *P. brasiliensis* in 4 geographic regions: Madre de Dios/Madeira, Itenez, Pantanal, and Amazon–Orinoco–Guianas (Pickles et al. 2011).

## CONSERVATION

The International Union for the Conservation of Nature and Natural Resources lists the status of *Pteronura brasiliensis* as

“Endangered,” with current trends unknown (Groenendijk et al. 2015). *P. brasiliensis* is listed under the Species Protection Regulations (1999) in Guyana (van der Waal 2012).

The greatest problems facing *P. brasiliensis* are habitat destruction, illegal hunting, heavy metal contamination, disease, overfishing by humans, and stress caused by tourism (Staib and Schenck 1994; Schenck and Staib 1998). Concerns exist regarding the contribution by the gold mining industry of mercury and methylmercury, which concentrates at higher trophic levels (Gutleb et al. 1997; Uryu et al. 2001; Roach et al. 2013). However, tissue samples from 2 specimens revealed levels below toxicity (Fonseca et al. 2005).

*Pteronura brasiliensis* populations thrive in uninhabited areas but are threatened in populated areas (McTurk and Spelman 2005). An investigation of 3 sites near the National Forest of Amapá in Brazil showed that the presence of *P. brasiliensis* decreased or disappeared as human habitation and boats increased, rarely occurring within 40 km of a town (de Oliveira et al. 2015).

Illegal traffic in skins remains a threat (Chehébar 1991). A hunter may receive \$27–50 for a single pelt, with the skin going for 5 times that amount in the United States or Europe (Dourojeanni 1974; Ayres and Best 1979; Smith 1980–1981). Historic data show nearly 20,000 skins exported from the Brazilian Amazon between 1960 and 1969 and in the Peruvian Amazon, 24,000 skins (Smith 1980–1981). In 1989–1990, 240 *P. brasiliensis* pelts were found in a warehouse in Argentina (possibly from other countries—Chehébar 1991).

*Pteronura brasiliensis* is viewed as threatening because of its size or as competition for river fish and concern for damaged nets (Gómez and Jorgenson 1999; Gómez Serrano 2003; McTurk and Spelman 2005; Recharte et al. 2009, 2014; Michalski et al. 2012; Rosas-Ribeiro et al. 2012). Attempted attacks (no injuries sustained) on humans have been reported in Brazil (Lasmar et al. 2013). *P. brasiliensis* is captured and kept as pets in Colombia, but may become financial burdens on their host families (Gómez Serrano 2003). *P. brasiliensis* meat is occasionally used as bait for capturing tortoises (Uscamaita and Bodmer 2009). Because the Department of Agriculture of Peru banned the hunting of *P. brasiliensis* in 1973, sightings of individuals increased from 2 to 41 in 2004 in the Yvarí-Mirín and Yavarí rivers (Uscamaita and Bodmer 2009).

In Colombia, 2 *P. brasiliensis* cubs were successfully rehabilitated for 7 months and released into the wild, where 1 was adopted by a preexisting *P. brasiliensis* family, and the other became the matriarch of her own group (Gómez Serrano 2003). In Guyana, 18 of 34 orphaned *P. brasiliensis* were successfully rehabilitated and returned to the wild (McTurk and Spelman 2005). A juvenile, reintroduced to the Orinoco region of Colombia, was sited 17 months after release (Morales-Betancourt 2011). *P. brasiliensis* may return to disturbed areas (Calaça et al. 2015).



## ACKNOWLEDGMENTS

Thanks to the staff of the American Museum of Natural History for their assistance with photography of the skull. Thanks also to D. Chen for photographic composition and map design. Dr. J. Quadros and an anonymous reviewer improved the content and quality of the manuscript.

## LITERATURE CITED

- ALLEN, J. A. 1910. Mammals from the Caura district of Venezuela, with description of a new species of *Chrotopterus*. *Bulletin of the American Museum of Natural History* 28:145–149.
- AYRES, J. M., AND R. BEST. 1979. Estratégias para a conservação da fauna amazônica. *Acta Amazônica, Suplemento* 9:81–101.
- BARRÈRE, P. 1749. Essai sur l'histoire naturelle de la France équinoxiale ou de n'ombrement des plantes, des animaux & des minéraux, qui se trouvent dans l'Isle de Cayenne, les Isles de Remire, sur les côtes de la mer, & dans le continent de la Guyane. Piget, S. Jacques, France.
- BARNETT, A., R. SHAPLEY, S. LEHMAN, E. HENRY, AND P. BENJAMIN. 2000. Records of the giant otter, *Pteronura brasiliensis*, from Guyana. *IUCN Otter Specialist Group Bulletin* 17:65–74.
- BECCACECI, M. D., AND T. WALLER. 2000. Presence of the giant otter, *Pteronura brasiliensis*, in the Corrientes Province, Argentina. *IUCN Otter Specialist Group Bulletin* 17:31–33.
- BEZERRA, B. M., A. S. SOUTO, N. SCHIEL, AND G. JONES. 2011. Notes on vocalisations of giant otters in the flooded Igapó forests of Jaú National Park, Amazonas, Brazil. *Journal of Ethology* 20:69–175.
- BJORK, P. R. 1970. The Carnivora of the Hagerman local fauna (late Pliocene) of southwestern Idaho. *Transactions of the American Philosophical Society, New Series* 60:3–54.
- BRISSON, M. J. 1762. *Regnum animale in classes IX distributum sive synopsis methodica sistens generalem animalium distributionem in classes IX, & duarum primarum classium, Quadrupedum scilicet & Cetaceorum, particularem divisionem in ordines, sectiones, genera & species. Lugduni Batavorum, Apud Theodorum Haak, Leiden, Netherlands.*
- BURMEISTER, H. 1879. *Description physique de la république Argentine. Tome troisième, Animaux vertébrés.* Paul-Émile Cori, Buenos Aires, Argentina.
- BURTON, M. 1962. *Systematic dictionary of mammals of the world.* Museum Press, London, United Kingdom.
- CABRAL, M. M. M., J. ZUANON, G. E. DE MATTOS, AND F. C. W. ROSAS. 2010. Feeding habits of giant otters *Pteronura brasiliensis* (Carnivora: Mustelidae) in the Balbina hydroelectric reservoir, central Brazilian Amazon. *Zoologica* 27:47–53.
- CABRERA, A. 1958. *Catálogo de los mamíferos de América del Sur.* Revista del Museo Argentino de Ciencias Naturales <<Bernardino Rivadavia>>, Buenos Aires, Argentina.
- CALAÇA, A. M., O. J. FAEDO, AND F. R. DE MELO. 2015. Hydroelectric dams: the first responses from giant otters to a changing environment. *IUCN Otter Specialist Group Bulletin* 21:48–58.
- CAMILO-ALVES, C., AND A. DESBIEZ. 2005. The use of a natural cave for breeding by giant otters in the Brazilian Pantanal: observations and new insights on giant otter behavior. *IUCN Otter Specialist Group Bulletin* 18:21–24.
- CARTER, S. K., AND F. C. W. ROSAS. 1997. Biology and conservation of the giant otter *Pteronura brasiliensis*. *Mammal Review* 27:1–26.
- CARTER, S. K., F. C. W. ROSAS, A. B. COOPER, AND A. C. CORDEIRO-DUARTE. 1999. Consumption rate, food preferences and transit time of captive giant otter *Pteronura brasiliensis*: implications for the study of wild populations. *Aquatic Mammals* 25:79–90.
- CHEHÉBAR, C. 1990. Action plan for Latin American otters. Pp. 64–113 in *Otters: an action plan for their conservation* (P. Foster-Turley, S. Macdonald, and C. Mason, eds.). International Union for Conservation of Nature and Natural Resources/Species Survival Commission Otter Specialist Group, Brookfield, Illinois.
- CHEHÉBAR, C. 1991. News from Argentina. *IUCN Otter Specialist Group Bulletin* 6:17–18.
- COSTA-PEREIRA, R. 2012. Small fishes follow large mammals suspending sediment. *Revista Chilena de Historia* 85:361–364.
- DAVENPORT, L. C. 2008. Behavior and ecology of the giant otter (*Pteronura brasiliensis*) in oxbow lakes of the Manu Biosphere Preserve, Peru. Ph.D. dissertation, University of North Carolina, Chapel Hill.
- DAVENPORT, L. C. 2010. Aid to a declining matriarch in the giant otter (*Pteronura brasiliensis*). *PLoS One* 5:1–6.
- DE OLIVEIRA, G. C., J. F. M. BARCELLOS, S. M. LAZZARINI, AND F. C. W. ROSAS. 2011. Gross anatomy and histology of giant otter (*Pteronura brasiliensis*) and Neotropical otter (*Lontra longicaudis*) testes. *Animal Biology* 61:175–183.
- DE OLIVEIRA, G. C., J. F. M. BARCELLOS, AND F. C. W. ROSAS. 2007. Age estimation in giant otters (*Pteronura brasiliensis*) (Carnivora: Mustelidae) using growth layer groups in canine teeth. *Latin American Journal of Aquatic Mammals* 6:155–160.
- DE OLIVEIRA, I. A. P., D. NORRIS, AND F. MICHALSKI. 2015. Anthropogenic and seasonal determinants of giant otter sightings along waterways in the northern Brazilian Amazon. *Mammalian Biology* 80:39–46.
- DE THOISY, B., M. REUIZ-GARCIA, L. CASTELLANOS-MORA, AND A. LAVERGNE. 2013. How are Amazon and Orinoco Rivers related? Preliminary results on the comparative history, structure and dynamics of giant otters, *Pteronura brasiliensis*, from Western Amazonia. Pp. 85–95 in *Molecular population genetics, evolutionary biology and biological conservation of Neotropical carnivores* (M. Ruiz-Garcia and J. M. Shostell, eds.). Nova Science Publishers, Hauppauge, New York.
- DEFLER, T. R. 1983. Associations of the giant river otter (*Pteronura brasiliensis*) with fresh-water dolphins (*Inia geoffrensis*). *Journal of Mammalogy* 64:692.
- DÍAZ, H. J., AND I. M. SÁNCHEZ. 2002. Historical and actual presence of the giant otter (*Pteronura brasiliensis*) on the lower Meta River, Department of Casanare—Colombia Orinoquia. *IUCN Otter Specialist Group Bulletin* 19:97–102.
- DOUROJEANNI, M. J. 1974. Impacto de la producción de la fauna silvestre en la economía de la Amazonia Peruana. *Revista Forestal del Perú* 5:1–14.
- DUPLAIX, N. 1980. Observations on the ecology and behavior of the giant river otter *Pteronura brasiliensis* in Suriname. *Revue d'Ecologie (La Terre et la Vie)* 34:495–620.
- ESTES, J. A. 1989. Adaptation for aquatic living by carnivores. Pp. 242–282 in *Carnivore behavior, ecology, and evolution* (J. L. Gittleman, ed.). Cornell University Press, Ithaca, New York.
- EVANGELISTA, E. 2004. Change of partners in a giant otter alpha couple. *IUCN Otter Specialist Group Bulletin* 21:47–51.
- EVANGELISTA, E., AND F. C. W. ROSAS. 2011a. Breeding behavior of giant otter (*Pteronura brasiliensis*) in the Sixuan Reserve, Roraima, Brazil. *IUCN Otter Specialist Group Bulletin* 28A:5–10.
- EVANGELISTA, E., AND F. C. W. ROSAS. 2011b. The home range and movements of giant otters (*Pteronura brasiliensis*) in the Xixuaú Reserve, Roraima, Brazil. *IUCN Otter Specialist Group Bulletin* 28A:31–37.
- FONSECA, F. R. D., O. MALM, AND H. F. WALDEMARIN. 2005. Mercury levels in tissues of giant otters (*Pteronura brasiliensis*) from the Rio Negro, Pantanal, Brazil. *Environmental Research* 98:368–371.
- FOUNTAIN, P. 1902. *The great mountains and forests of South America.* Longmans, Green and Co., London, United Kingdom.
- FRANCO-DE-SÁ, J. F. O., F. C. W. ROSAS, AND E. FELDBERG. 2007. Cytogenetic study of the giant otter *Pteronura brasiliensis* Zimmerman 1780 (Carnivora, Mustelidae, Lutrinae). *Genetics and Molecular Biology* 30:1093–1096.
- FREITAS, J. F. T., AND H. LENT. 1941. Sobre um novo parasite de ariranha: *Cloeoscaris longispiculum* n. sp. (Nematoda, Ascaroidea). *Revista Brasileira de Biologia* 1:267–270.
- FREITAS, J. F. T., AND H. LENT. 1949. Nova “*Dirofilaria*” parasite do aparelho circulatório de ariranha (Nematoda, Filarioidea). *Revista Brasileira de Biologia* 9:377–380.

- GARCIA, D. M., M. MARMONTEL, F. W. ROSAS, AND F. R. SANTOS. 2007. Conservation genetics of the giant otter (*Pteronura brasiliensis* (Zimmerman, 1780)) (Carnivora, Mustelidae). *Brazilian Journal of Biology* 67(4, Suppl.):819–827.
- GERVAIS, P. 1855. *Histoire naturelle des mammifères*. Volume 2. L. Curmer, Paris, France.
- GMELIN, J. F. 1788. *Caroli a Linné, systema naturae per regna tria naturae, secundum classes, ordines, genera, species, cum characteribus, differentiis, synonymis, locis*. Tomus I. Editio decima tertia, aucta, reformata. G. E. Beer, Leipzig, Germany.
- GÓMEZ, J. R., J. P. JORGENSEN. 1999. An overview of the giant otter fisherman problem in the Orinoco basin of Colombia. *IUCN Otter Specialist Group Bulletin* 16:90–96.
- GÓMEZ SERRANO, J. R. 2003. Follow up to a rehabilitation of giant otter cubs in Colombia. *IUCN Otter Specialist Group Bulletin* 20:42–44.
- GOPEE, N. V., A. A. ADESLYUN, AND K. CAESAR. 2000. Retrospective and longitudinal study of salmonellosis in captive wildlife in Trinidad. *Journal of Wildlife Diseases* 36:284–293.
- GRAY, J. E. 1837. Description of some new or little known Mammalia, principally in the British Museum collection. *Magazine Natural History, and Journal of Zoology, Botany, Mineralogy, Geology, and Meteorology, New Series* 1:577–587.
- GRAY, J. E. 1839. On some new or little known Mammalia. *Annals of Natural History or Magazine of Zoology, Botany, and Geology* 2:284–287.
- GRAY, J. E. 1843. List of the specimens of Mammalia in the collection of the British Museum. *British Museum (Natural History) Publications*, London, England.
- GRAY, J. E. 1868. On *Pteronura sanbachii*, an otter from Surinam. *Annals and Magazine of Natural History, Fourth Series* 1:154–155.
- GRAY, J. E. 1869. Catalogue of carnivorous, pachydermatous, and edentate Mammalia in the British Museum. *British Museum (Natural History)*, London, England.
- GROENENDIJK, J., ET AL. 2014. Demography of the giant otter (*Pteronura brasiliensis*) in Manu National Park, south-eastern Peru: implications for conservation. *PLoS One* 9:1–15.
- GROENENDIJK, J., N. DUPLAIX, M. MARMONTEL, P. VAN DAMME, AND C. SCHENCK. 2015. *Pteronura brasiliensis*. IUCN Red List of Threatened Species. Version 2015. eT18711A21938411. [www.iucnredlist.org](http://www.iucnredlist.org). Accessed 21 February 2016.
- GUTLEB, A. C., C. SCHENCK, AND E. STAIB. 1997. Giant otter (*Pteronura brasiliensis*) at risk? Total mercury and methylmercury levels in fish and otter scats, Peru. *Ambio* 26:511–514.
- HANTKE, G., AND A. C. KITCHENER. 2015. How to sex giant otter *Pteronura brasiliensis* (Gmelin, 1788) cubs. *International Zoo Yearbook* 49:214–218.
- HARRIS, C. J. 1968. *Otters: a study of the Recent Lutrinae*. Weidenfeld and Nicolson, London, United Kingdom.
- HAYSEN, V., A. VAN TIENHOVEN, AND A. VAN TIENHOVEN. 1993. *Asdell's patterns of mammalian reproduction*. Cornell University Press, Ithaca, New York.
- HUSSON, A. M. 1978. *The mammals of Suriname*. E. J. Brill, Leiden, The Netherlands.
- INTERNATIONAL UNION FOR CONSERVATION OF NATURE. 2015. *Pteronura brasiliensis*. The IUCN Red List of Threatened Species. Version 2017. <http://maps.iucnredlist.org/map.html?id=18711>. Accessed 13 June 2017.
- KUHN, R. A., AND W. MEYER. 2009. Infrared thermography of the body surface in the Eurasian otter *Lutra lutra* and the giant otter *Pteronura brasiliensis*. *Aquatic Biology* 4:143–152.
- KUHN, R. A., AND W. MEYER. 2010. Comparative hair structure in the Lutrinae (Carnivora: Mustelidae). *Mammalia* 74:291–303.
- LABRUNA, M. B., ET AL. 2005. Ticks (Acari: Ixodida) on wild carnivores in Brazil. *Experimental and Applied Acarology* 36:149–163.
- LAIDLER, L. 1986. Watching over the waterdogs. *BBC Wildlife* April:168–171.
- LAIDLER, K., AND L. LAIDLER. 1995. Giant among otters. *Wildlife Conservation* 98:40–47, 75.
- LARIVIÈRE, S. 1999. *Lontra longicaudis*. *Mammalian Species* 609:1–5.
- LASMAR, R. P., D. S. LIMA, AND M. MARMONTEL. 2013. What do local fishermen from the mid Solimões River think about the giant river otter? *Natural Resources, Aquidabã* 3:42–48.
- LESSON, R. P. 1842. *Nouveau tableau du règne animal: mammifères*. Arthus Bertrand, Paris, France.
- LEUCHTENBERGER, C., S. B. ALMEIDA, A. ANDRIOLO, AND P. G. CRAWSHAW, JR. 2016. Jaguar mobbing by giant otter groups. *Acta Ethologica* 19:143.
- LEUCHTENBERGER, C., AND G. MOURÃO. 2008. Social organization and territoriality of giant otters (Carnivora: Mustelidae) in a seasonally flooded savanna in Brazil. *Sociobiology* 52:257–270.
- LEUCHTENBERGER, C., AND G. MOURÃO. 2009. Scent-marking of giant otter in the southern Pantanal, Brazil. *Ethology* 115:210–216.
- LEUCHTENBERGER, C., L. G. R. OLIVEIRA-SANTOS, W. MAGNUSSEN, AND G. MOURÃO. 2013. Space use by giant otter groups in the Brazilian Pantanal. *Journal of Mammalogy* 94:320–330.
- LEUCHTENBERGER, C., C. A. ZUCCO, C. RIBAS, W. MAGNUSSEN, AND G. MOURÃO. 2014. Activity patterns of giant otters recorded by telemetry and camera traps. *Ethology Ecology and Evolution* 26:19–28.
- LIMA, D. S., AND M. MARMONTEL. 2011. Return to the wild of a giant river otter (*Pteronura brasiliensis*) cub to its family group in Amanã Sustainable Development Reserve, Brazilian Amazon. *Latin American Journal of Aquatic Mammals* 9:164–167.
- LIMA, D. S., M. MARMONTEL, AND E. BERNARD. 2012. Site and refuge use by giant river otters (*Pteronura brasiliensis*) in the Western Brazilian Amazonia. *Journal of Natural History* 46:729–739.
- LONDOÑO, G. C., AND N. T. MUÑOZ. 2006. Reproduction, behaviour and biology of the giant river otter *Pteronura brasiliensis* at Cali Zoo. *International Zoo Yearbook* 40:360–371.
- MACHADO, G. V., F. C. W. ROSAS, AND S. M. LAZZARINI. 2009. Topografia do cone medular na ariranha (*Pteronura brasiliensis* Zimmermann, 1780). *Ciência Animal Brasileira* 10:301–305.
- MARCGRAF [MARCGRAVE], G. 1648. *Historia rerum naturalium, liber sextus, quiaigit de quadrupedibus, & serpentibus; historia naturalis Brasiliae*. Joannes de Laet, Leiden, Netherlands.
- McTURK, D., AND L. SPELMAN. 2005. Hand-rearing and rehabilitation of orphaned wild giant otters, *Pteronura brasiliensis*, on the Rupununi River, Guyana, South America. *Zoo Biology* 24:153–167.
- MICHALSKI, F., P. C. CONCEIÇÃO, J. A. AMADOR, J. LAUFER, AND D. NORRIS. 2012. Local perceptions and implications for giant otter (*Pteronura brasiliensis*) conservation around protected areas in the eastern Brazilian Amazon. *IUCN Otter Specialist Group Bulletin* 29:34–45.
- MORALES-BETANCOURT, D. 2011. Report of an adaptive reintroduction of a juvenile giant otter (*Pteronura brasiliensis*). *IUCN Otter Specialist Group Bulletin* 28:23–33.
- MOURÃO, G., AND L. CARVALHO. 2001. Cannibalism among giant otters (*Pteronura brasiliensis*). *Mammalia* 65:225–227.
- MUANIS, M. C., AND L. F. B. OLIVEIRA. 2011. Habitat use and food niche overlap by Neotropical otter, *Lontra longicaudis*, and giant otter, *Pteronura brasiliensis*, in the Pantanal wetland, Brazil. *IUCN Otter Specialist Group Bulletin* 28A:76–85.
- MUMM, C. A. S., M. C. URRUTIA, AND M. KNÖRNSCHILD. 2014. Vocal individuality in cohesion calls of giant otters, *Pteronura brasiliensis*. *Animal Behaviour* 88:243–252.
- NEHRING, A. 1899[1900]. Über *Lutra (Pteronura) paranensis*, Renegger, und ein lebendes Welbeben dieser Art. *Sitzungsberichte der Gesellschaft Naturforschender Freunde zu Berlin* 1900:221–228.
- OLFFERS, I. F. W. M., von. 1818. Bemerkungen zu Illiger's Ueberblick der Säugthiere, nach ihrer Vertheilung über die Welttheile, rück-sichtlich der Südamericanischen Arten (Species). Pp. 192–237 in *Journal von Brasilien, oder vermischte Nachrichten aus Brasilien, auf wissenschaftlichen Reisen gesammelt (W. L. Eschwege, author)*. Volume 15 of *Neue Bibliothek der wichtigsten Reisebeschreibungen zur Erweiterung der Erd- und Völkerkunde; in Verbindung mit einigen anderen Gelehrten gesammelt und herausgegeben (F. I. Bertuch, ed.)*. Verlage des Landes - Industrie - Comptoirs, Weimar, Germany.
- PARERA, A. F. 1992. Present knowledge on the giant otter in Argentina. *IUCN Otter Specialist Group Bulletin* 7:19–22.

- PICKLES, R. A., J. J. GROOMBRIDGE, V. D. Z. ROJAS, AND W. C. JORDAN. 2009. Cross-species characterisation of polymorphic microsatellite loci in the giant otter (*Pteronura brasiliensis*). *Molecular Ecology Resources* 9:415–417.
- PICKLES, R. S. A., ET AL. 2011. Evolutionary history and identification of conservation units in the giant otter, *Pteronura brasiliensis*. *Molecular Phylogenetics and Evolution* 61:616–617.
- POHLE, H. 1919 (1920). Die Unterfamilie der Lutrinae. (Eine systematisch-geographische Studie an dem Material der Berliner Museen). *Archiv für Naturgeschichte Fünfundachtzigster Jahrgang* 85:abteilung A, heft 9:1–247.
- PREVOSTI, F. J., AND B. S. FERRERO. 2008. A Pleistocene giant river otter from Argentina: remarks on the fossil record and phylogenetic analysis. *Journal of Vertebrate Paleontology* 28:1171–1181.
- QUELCH, J. J. 1901. *Animal life in British Guiana*. Argosy Publishers, Ltd., Georgetown, British Guiana.
- RAMALHEIRA, C. DOS S., B. F. BOZZETTI, A. D. DA CRUZ, A. F. PALMEIRIM, M. M. M. CABRAL, AND F. C. W. ROSAS. 2015. First record of jaguar predation on giant otter (*Pteronura brasiliensis*). *Animal Biology* 65:81–86.
- RAY, J. 1693. *Synopsis methodica animalium quadrupedum et serpentini generis*. Robert Southwell, London, England.
- RECHARTE, M., M. BOWLER, AND R. BODMER. 2009. Potential conflict between fishermen and giant otter (*Pteronura brasiliensis*) populations by fishermen in response to declining stocks of arowana fish (*Osteoglossum bicirrhosum*) in northeastern Peru. *IUCN Otter Specialist Group Bulletin* 25:89–93.
- RECHARTE, M., I. G. BRIDE, AND M. BOWLER. 2014. A recovering flagship: giant otters, communities and tourism. *Wildlife Research* 41:490–498.
- RENGGER, J. R. 1830. *Naturgeschichte der Säugethiere von Paraguay*. Schweighauser, Basel, Switzerland.
- RIBAS, C. 2012. *Grau de parentesco e relações sociais em ariranhas (Pteronura brasiliensis)*. Ph.D. dissertation, Instituto Nacional de Pesquisas da Amazônia, Manaus, Amazonas, Brazil.
- RIBAS, C., H. A. CUNHA, G. DAMASCENO, W. MAGNUSSON, A. SOLÉ-CAVA, AND G. MOURÃO. 2016. More than meets the eye: kinship and social organization in giant otters (*Pteronura brasiliensis*). *Behavioral Ecology and Sociobiology* 70:61–72.
- RIBAS, C., G. DAMASCENO, W. MAGNUSSON, C. LEUCHTENBERGER, AND G. MOURÃO. 2012. Giant otters feeding on caiman: evidence for an expanded trophic niche of recovering populations. *Studies on Neotropical Fauna and Environment* 47:19–23.
- RIBAS, C., AND G. MOURÃO. 2004. Intraspecific agonism between giant otter groups. *IUCN Otter Specialist Group Bulletin* 21:89–93.
- RIBAS, C., A. V. VASCONCELLOS, G. MOURÃO, W. MAGNUSSON, A. M. SOLÉ-CAVA, AND H. A. CUNHA. 2011. Polymorphic microsatellite loci from the endangered giant otter (*Pteronura brasiliensis*). *Conservation Genetics Resources* 3:769–771.
- ROACH, K. A., N. F. JACOBSEN, C. V. FIORELLO, A. STRONZA, AND K. O. WINEMILLER. 2013. Gold mining and mercury bioaccumulation in a floodplain lake and main channel of the Tambopata River, Perú. *Journal of Environmental Protection* 4:51–60.
- RODRIGUES, L. DE A., C. LEUCHTENBERGER, AND V. C. F. DA SILVA. 2013. Avaliação do risco de extinção da ariranha *Pteronura brasiliensis* (Zimmermann, 1780) no Brasil. *Avaliação do estado de conservação dos carnívoros. Biodiversidade Brasileira* 3:228–239.
- ROSAS, F. C. W., M. M. M. CABRAL, AND G. E. DE MATTOS. 2008b. Predation or scavenging of giant otter (*Pteronura brasiliensis*) cubs by lizards. *IUCN Otter Specialist Group Bulletin* 25:100–103.
- ROSAS, F. C. W., M. M. M. CABRAL, G. E. DE MATTOS, AND R. E. SILVA. 2009b. Parental and alloparental care of giant otters (*Pteronura brasiliensis*) (Carnivora, Mustelidae) in Balbina hydroelectric lake, Amazonas, Brazil. *Sociobiology* 54:919–924.
- ROSAS, F. C. W., T. M. S. DA CRUZ, S. L. GIANIZELLA, C. S. RAMALHEIRA, AND T. F. MARTINS. 2016. A first record of ticks in free-ranging giant otter (*Pteronura brasiliensis*) in the Brazilian Amazon. *IUCN Otter Specialist Group Bulletin* 33:3–7.
- ROSAS, F. C. W., AND G. E. DE MATTOS. 2003. Natural deaths of giant otters (*Pteronura brasiliensis*) in Balbina hydroelectric lake, Amazonas, Brazil. *IUCN Otter Specialist Group Bulletin* 20:62–64.
- ROSAS, F. C. W., G. E. DE MATTOS, AND M. M. M. CABRAL. 2007. The use of hydroelectric lakes by giant otters *Pteronura brasiliensis*: Balbina lake in central Amazonia, Brazil. *Oryx* 41:520–524.
- ROSAS, F. C. W., C. S. DE ROCHA, G. E. DE MATTOS, AND S. M. LAZZARINI. 2009a. Body-weight relationships in giant otters (*Pteronura brasiliensis*) (Carnivora, Mustelidae). *Brazilian Archives of Biology and Technology* 52:587–591.
- ROSAS, F. C. W., J. A. D'A. NETO, AND G. E. DE MATTOS. 2008a. Anesthesiology, hematology and serum chemistry of the giant otter, *Pteronura brasiliensis* (Carnivora, Mustelidae). *Arquivos de Ciências Veterinárias e Zoologia da UNIPAR* 11:81–85.
- ROSAS, F. C. W., J. A. S. ZUANON, AND S. K. CARTER. 1999. Feeding ecology of the giant otter, *Pteronura brasiliensis*. *Biotropica* 31:502–506.
- ROSAS-RIBEIRO, P. F., F. C. W. ROSAS, AND J. ZUANON. 2012. Conflict between fishermen and giant otters *Pteronura brasiliensis* in western Brazilian Amazon. *Biotropica* 44:437–444.
- SANTOS, E. 1945. *Entre o Gamba e o Macaco*. F. Brigúiet and Cie, Rio de Janeiro, Brazil.
- SANDERSON, I. T. 1949. A brief review of the mammals of Suriname (Dutch Guiana), based upon a collection made in 1938. *Proceedings of the Zoological Society of London* 119:755–789.
- SCHENCK, C., AND E. STAIB. 1998. Status, habitat use and conservation of giant otter in Peru. Pp. 359–170 in *Behaviour and ecology of riparian mammals* (N. Dunstone and M. L. Gorman, eds.). Cambridge University Press, Cambridge, United Kingdom.
- SCHINZ, H. R. 1821. *G. Cuvier, Das Tierreich eingeteilt nach dem Bau der Tiere als Grundlage ihrer Naturgeschichte und der vergleichenden Anatomie*. Cotta, Stuttgart, Germany.
- SCHOMBURGK, R. 1840. Information respecting botanical zoological travellers. *Annals of Natural History* 5:282–288.
- SHACKLEY, M. 1998. Designating a protected area at Karanambu Ranch, Rupununi Savannah, Guyana: resource management and indigenous communities. *Ambio* 27:207–210.
- SHAW, G. 1800. *General zoology or systematic natural history*. Volume 1, part 2. G. Kearsley, London, United Kingdom.
- SILVA, R. E., F. C. W. ROSAS, AND J. ZUANON. 2014. Feeding ecology of the giant otter (*Pteronura brasiliensis*) and the Neotropical otter (*Lontra longicaudis*) in Jaú National Park, Amazon, Brazil. *Journal of Natural History* 48:465–479.
- SILVEIRA, L., ET AL. 2011. Tagging giant otter (*Pteronura brasiliensis*) (Carnivora, Mustelidae) for radio-telemetry studies. *Aquatic Mammals* 27:208–212.
- SMITH, N. J. H. 1980–1981. Caimans, capybaras, otter, manatees, and man in Amazonia. *Biological Conservation* 19:177–187.
- SMITH, J. R., C. LOMBARDI, K. LENGEL, M. MASLANKA, B. HENRY, AND G. MYERS. 2009. *Otter (Lutrinae) care manual*. Association of Zoos and Aquariums, Silver Spring, Maryland.
- STAIB, E. 2005. *Eco-etología del Lobo de Río (Pteronura brasiliensis)*. Sociedad Zoológica de Franciort, Franciort, Peru.
- STAIB, E., AND C. SCHENCK. 1994. Giant otters and ecotourism in Peru. *IUCN Otter Specialist Group Bulletin* 9:7–8.
- SYKES-GATZ, S. 2004. *International giant otter studbook husbandry and management information guidelines (2005): husbandry and management of the giant otter (Pteronura brasiliensis)*. 2nd ed. Zoologischer Garten Dortmund, Dortmund, Germany.
- THOMAS, O. 1908. LXIII. On certain African and South American otters. *Annals and Magazine of Natural History, Including Zoology, Botany, and Geology, Eighth Series* 1:387–395.
- TRAMM, I. 2014. Presence of giant otters (*Pteronura brasiliensis*) in the Río Torno in northern Peru. *IUCN Otter Specialist Group Bulletin* 31:49–54.
- URYU, Y., O. MALM, I. THORNTON, I. PAYNE, AND D. CLEARY. 2001. Mercury contamination of fish and its implications for other wildlife of the Tapajos Basin, Brazilian Amazon. *Conservation Biology* 15:438–446.
- USCAMAITA, M. R., AND R. BODMER. 2009. Recovery of the endangered giant otter *Pteronura brasiliensis* on the Yavarí-Marín and Yavarí rivers: a success story for CITES. *Oryx* 44:83–88.



- VAN DAMME, P., ET AL. 2002. Distribution and population status of the giant otter *Pteronura brasiliensis* in Bolivia. IUCN Otter Specialist Group 19:87–96.
- VANDERWAAL, Z. 2012. Giant otter (*Pteronura brasiliensis*) national assessment: conservation status of *Pteronura brasiliensis* in Guyana. <http://research.ncl.ac.uk/iwokrama/assets/pdf/ReportGiantOtterIUCNGuyana.pdf>. Accessed 17 March 2014.
- VIEIRA, C. O. da C. 1952. Notas sobre os mamíferos obtidos pela expedição do instituto Butantã ao Rio das Mortes e Serra do Roncador. Papéis Avulsos, Departamento de Zoology, São Paulo 10:105–125.
- WATERTON, C. 1879. Wanderings in South America. Macmillan and Co., London, United Kingdom.
- WEIGL, R. 2005. Longevity of mammals in captivity; from the living collections of the world. E. Schweizerbart'sche Verlagsbuchhandlung, Stuttgart, Germany.
- WIEGMANN, A. F. A. 1838a (1839). Betrachtungen über das Gebifs der Raubthiere (Ferae) vom Herausgeber. Erste Abhandlung. Das Gebifs der carnivoren und omnivoren Raubthiere. Archiv für Naturgeschichte 4:257–296.
- WIEGMANN, A. F. A. 1838b (1839). Bericht über die Leistungen in Bearbeitung der übrigen Thierklassen, während des Jahres 1837. Archiv für Naturgeschichte 4:309–395.
- WILDLIFE RESERVES SINGAPORE. 2013. Asia's first giant river otter baby among more than 400 births at Wildlife Reserves Singapore. Press release, October 13.
- ZIMMERMANN, E. A. W. 1777. Specimen zoologiae geographicae, quadrupedum domicilia et migrationes sistens. Lugduni Batavorum, Apud Theodorum Haak, et socios, Leiden, Netherlands.
- ZIMMERMANN, E. A. W. 1780. Geographische Geschichte des Menschen, und der allgemein verbreiteten vierfüssigen Thiere. Zweiter Band. Weygandschen Buchhandlung, Leipzig, Germany.

Associate Editor of this account was DAVID ZEGERS. Editor was MEREDITH J. HAMILTON.
